# Supplementary material for: Per- and Poly-Fluoroalkyl Substances in Portuguese Rivers: Spatial-Temporal Monitoring
Source: MDPI journal article supplement (doi:10.3390/molecules28031209), 2023-01-26
Supplement: s1 [file s1]

## SUPPLEMENTARY MATERIAL

# Per- and Poly-Fluoroalkyl Substances in Portuguese Rivers: Spatial-Temporal Monitoring

Marta O. Barbosa <sup>1,2,3</sup>, Nuno Ratola <sup>2,4</sup>, Vera Homem <sup>2,4</sup>, M. Fernando R. Pereira <sup>1,2</sup>,  
Adrián M. T. Silva <sup>1,2</sup>, Ana R. L. Ribeiro <sup>1,2</sup>, Marta Llorca <sup>5,\*</sup> and Marinella Farré <sup>5,\*</sup>

<sup>1</sup> LSRE-LCM—Laboratory of Separation and Reaction Engineering-Laboratory of Catalysis and Materials, Faculty of Engineering, University of Porto, Rua Dr. Roberto Frias, 4200-465 Porto, Portugal

<sup>2</sup> ALiCE—Associate Laboratory in Chemical Engineering, Faculty of Engineering, University of Porto, Rua Dr. Roberto Frias, 4200-465 Porto, Portugal

<sup>3</sup> Centre for Research and Intervention in Education (CIIE), Faculdade de Psicologia e de Ciências da Educação, Universidade do Porto, Rua Alfredo Allen s/n, 4200-135 Porto, Portugal

<sup>4</sup> LEPABE—Laboratory for Process Engineering, Environment, Biotechnology and Energy, Faculty of Engineering, University of Porto, Rua Dr. Roberto Frias, 4200-465 Porto, Portugal

<sup>5</sup> ON-HEALTH Research Group, Institute of Environmental Assessment and Water Research (IDAEA-CSIC), C/Jordi Girona, 18-26, 08034 Barcelona, Spain

\* Correspondence: ML [mlcqam@cid.csic.es](mailto:mlcqam@cid.csic.es) (M.L.); [mfuqam@cid.csic.es](mailto:mfuqam@cid.csic.es) (M.F.)

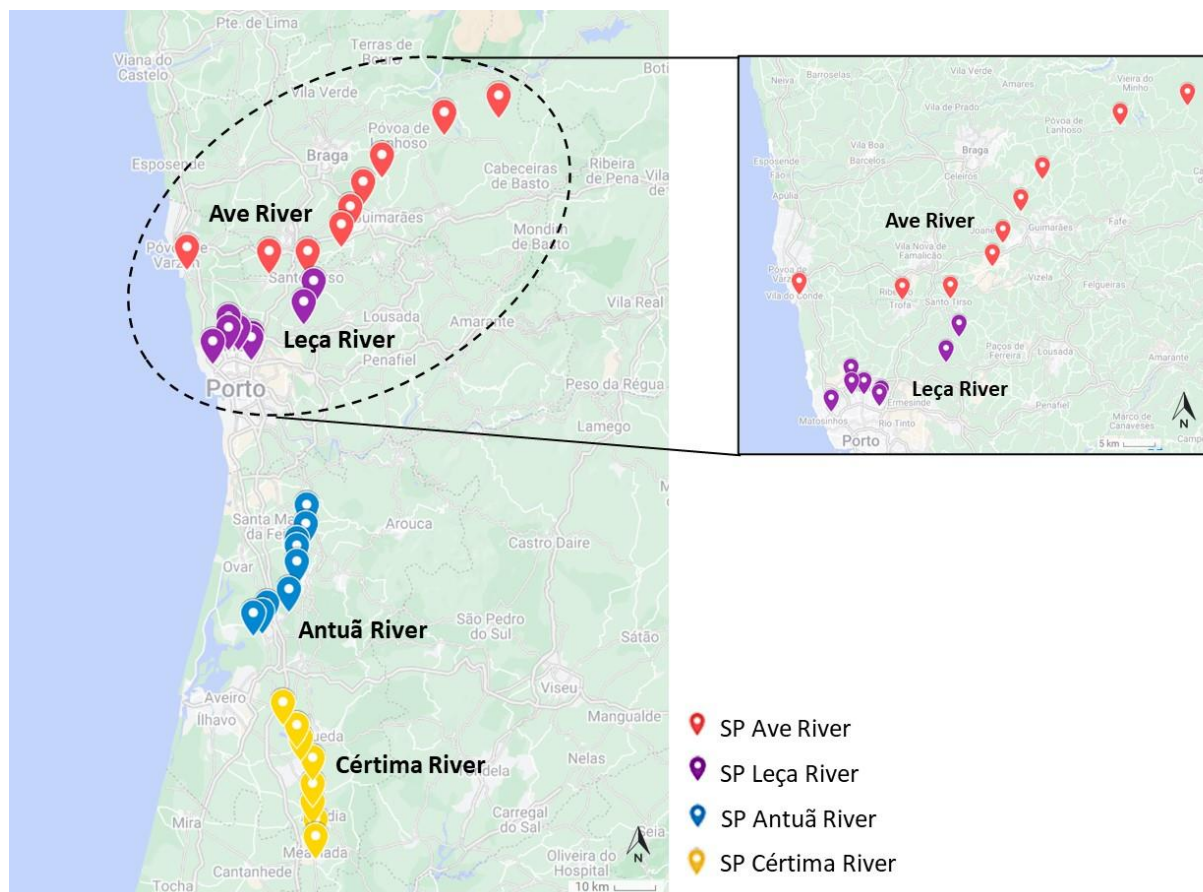

**Figure S1.** Target Portuguese rivers (Ave, Leça, Antuã, and Cértima) and location of sampling sites.

**Table S1.** Concentration (ng L<sup>-1</sup>) of PFASs at different sampling points (SP) of the target Portuguese rivers, in the dry and wet seasons.

|       |    | Concentration (ng L <sup>-1</sup> ) |        |        |        |        |        |        |        |        |        |        |        |        |        |        |        |        |        |
|-------|----|-------------------------------------|--------|--------|--------|--------|--------|--------|--------|--------|--------|--------|--------|--------|--------|--------|--------|--------|--------|
| River | SP | PFBA                                |        | PFHpA  |        | PFOA   |        | PFNA   |        | PFDA   |        | PFTeA  |        | PFHxS  |        | PFOS   |        | PFBS   |        |
|       |    | Dry                                 | Wet    | Dry    | Wet    | Dry    | Wet    | Dry    | Wet    | Dry    | Wet    | Dry    | Wet    | Dry    | Wet    | Dry    | Wet    | Dry    | Wet    |
| Ave   | 1  | 3.50                                | < MLOQ | < MLOD | < MLOQ | 5.70   | < MLOQ | 0.60   | < MLOD | 0.20   | < MLOQ |
|       | 2  | < MLOD                              | < MLOQ | < MLOD | < MLOQ | 5.45   | 0.94   | < MLOD | < MLOQ |
|       | 3  | < MLOD                              | < MLOQ | < MLOD | < MLOQ | 4.45   | 0.51   | < MLOD | < MLOQ |
|       | 4  | < MLOD                              | < MLOQ | < MLOQ | < MLOQ | 4.05   | 0.37   | < MLOD | < MLOD | 0.10   | < MLOD | 0.37   |
|       | 5  | < MLOD                              | < MLOQ | < MLOQ | < MLOQ | 5.50   | 0.39   | < MLOQ | < MLOD | 1.80   | < MLOD | < MLOQ | < MLOD | 0.37   |
|       | 6  | < MLOD                              | < MLOQ | 7.65   | < MLOQ | 7.95   | 1.88   | < MLOQ | < MLOD | < MLOQ | < MLOD | 0.80   | < MLOQ | < MLOD | 0.52   |
|       | 7  | < MLOD                              | < MLOQ | 13.15  | < MLOQ | 14.50  | 4.13   | 2.30   | < MLOQ | < MLOQ | < MLOQ | < MLOD | < MLOD | < MLOD | < MLOD | 1.00   | < MLOD | < MLOD | 0.91   |
|       | 8  | < MLOD                              | < MLOQ | 18.30  | < MLOQ | 15.15  | 2.87   | 2.55   | < MLOQ | 3.40   | < MLOQ | < MLOD | < MLOD | < MLOD | < MLOD | 1.55   | < MLOQ | < MLOD | 0.86   |
|       | 9  | < MLOD                              | < MLOQ | 18.40  | < MLOQ | 12.85  | 2.22   | < MLOQ | < MLOD | 2.00   | < MLOD | < MLOD | < MLOD | < MLOQ | < MLOD | < MLOQ | < MLOQ | < MLOQ | 1.12   |
| Leça  | 1  | < MLOD                              | < MLOQ | < MLOD | < MLOQ | 1.65   | 0.08   | < MLOD | < MLOQ | < MLOD | < MLOQ | < MLOD |
|       | 2  | < MLOD                              | < MLOQ | < MLOQ | < MLOQ | 2.95   | 10.35  | < MLOD | < MLOQ | < MLOD |
|       | 3  | < MLOD                              | < MLOQ | < MLOD | < MLOQ | 11.45  | 1.81   | 2.10   | < MLOQ | 1.90   | < MLOQ | < MLOD | < MLOD | < MLOQ | < MLOD | 4.45   | 1.89   | < MLOQ | 0.56   |
|       | 4  | < MLOD                              | < MLOQ | < MLOD | < MLOQ | < MLOQ | 1.78   | < MLOD | < MLOQ | < MLOD | < MLOQ | < MLOD | < MLOD | < MLOQ | < MLOD | < MLOQ | 2.01   | < MLOQ | 0.74   |
|       | 5  | 0.20                                | < MLOQ | < MLOD | < MLOQ | < MLOQ | 4.14   | < MLOD | < MLOQ | < MLOQ | < MLOQ | < MLOD | < MLOD | < MLOQ | < MLOD | 4.95   | 3.50   | < MLOQ | 0.71   |
|       | 6  | < MLOD                              | < MLOQ | < MLOD | < MLOQ | < MLOQ | 1.28   | < MLOD | < MLOQ | < MLOQ | < MLOQ | < MLOD | < MLOD | < MLOQ | 0.31   | 8.90   | 3.49   | < MLOQ | 0.95   |
|       | 7  | < MLOD                              | < MLOQ | < MLOD | < MLOQ | < MLOQ | 1.78   | < MLOQ | < MLOQ | 2.75   | < MLOQ | 4.85   | < MLOD | < MLOQ | 0.39   | 6.65   | 4.47   | < MLOQ | 1.33   |
|       | 8  | < MLOD                              | < MLOQ | < MLOD | < MLOQ | 14.50  | 5.38   | < MLOQ | < MLOQ | < MLOQ | < MLOQ | < MLOD | < MLOD | < MLOQ | 0.35   | 5.85   | 5.38   | < MLOQ | 1.34   |
| Antuã | 1  | < MLOD                              | 22.57  | < MLOQ | < MLOQ | 3.35   | 1.63   | < MLOD | < MLOD | < MLOQ | < MLOD | < MLOQ | 0.70   | < MLOQ |
|       | 2  | < MLOD                              | 5.91   | < MLOD | < MLOQ | 3.80   | 1.67   | < MLOD | < MLOD | 0.20   | < MLOD | < MLOQ | < MLOQ | < MLOD | 0.53   |
|       | 3  | < MLOD                              | 5.89   | < MLOD | < MLOQ | 16.95  | 8.97   | < MLOQ | < MLOD | < MLOQ | < MLOD | 5.45   | < MLOD | < MLOD | < MLOD | 1.70   | < MLOQ | < MLOD | 0.63   |
|       | 4  | < MLOD                              | < MLOQ | < MLOD | < MLOQ | 14.70  | 7.76   | < MLOD | < MLOD | < MLOQ | < MLOD | < MLOQ | 4.61   | < MLOD | 0.60   |

|         |   |        |        |        |        |        |      |        |        |        |        |        |        |        |        |        |        |        |        |        |
|---------|---|--------|--------|--------|--------|--------|------|--------|--------|--------|--------|--------|--------|--------|--------|--------|--------|--------|--------|--------|
|         | 5 | < MLOD | < MLOQ | < MLOD | < MLOQ | 14.05  | 6.18 | < MLOD | < MLOQ | < MLOQ | < MLOQ | < MLOD | < MLOD | < MLOQ | < MLOD | 3.45   | 3.93   | < MLOQ | 0.43   |        |
|         | 6 | < MLOD | < MLOQ | < MLOD | < MLOQ | 7.85   | 4.99 | < MLOD | < MLOQ | < MLOD | < MLOQ | < MLOD | < MLOD | < MLOD | < MLOD | < MLOQ | 2.79   | < MLOD | < MLOQ |        |
|         | 7 | < MLOD | < MLOQ | < MLOD | < MLOQ | 11.75  | 5.49 | 1.00   | < MLOQ | < MLOQ | < MLOQ | < MLOD | < MLOD | < MLOQ | < MLOD | < MLOQ | < MLOQ | < MLOQ | 0.46   |        |
|         | 8 | < MLOD | < MLOQ | < MLOD | < MLOQ | 14.25  | 2.31 | 0.85   | < MLOQ | < MLOQ | < MLOQ | < MLOD | < MLOD | < MLOQ | < MLOD | 1.70   | 1.79   | < MLOQ | 0.41   |        |
|         | 9 | < MLOD | < MLOQ | < MLOD | < MLOQ | 9.60   | 4.74 | < MLOQ | < MLOQ | 0.25   | < MLOQ | < MLOD | < MLOD | < MLOQ | < MLOD | < MLOQ | 2.43   | < MLOQ | 0.39   |        |
| Cértima | 1 | < MLOD | 4.00   | < MLOD | < MLOQ | < MLOQ | 0.67 | < MLOQ | < MLOD | < MLOQ | < MLOD | < MLOQ | < MLOD | < MLOQ | 1.54   |
|         | 2 | < MLOD | 9.20   | < MLOD | < MLOQ | < MLOQ | 0.59 | < MLOD | < MLOQ | < MLOQ | < MLOQ | < MLOD | < MLOD | < MLOQ | < MLOD | < MLOD | < MLOD | < MLOQ | < MLOQ | 0.70   |
|         | 3 | 1.20   | 3.93   | < MLOD | < MLOQ | 5.25   | 1.13 | < MLOQ | < MLOD | < MLOQ | < MLOD | < MLOD | < MLOD | < MLOQ | < MLOD | < MLOD | < MLOD | < MLOQ | < MLOQ | 0.66   |
|         | 4 | 3.30   | 5.81   | < MLOD | < MLOQ | 3.85   | 0.23 | 1.85   | < MLOD | 1.05   | < MLOD | < MLOQ | < MLOD | 0.40   |
|         | 5 | 4.60   | 3.98   | < MLOD | < MLOQ | 10.05  | 1.05 | 2.05   | < MLOD | 1.75   | < MLOD | < MLOQ | < MLOQ | < MLOD | < MLOQ |
|         | 6 | 8.50   | 5.15   | < MLOD | < MLOQ | 4.70   | 1.96 | 0.90   | < MLOD | 3.35   | < MLOD | < MLOD | < MLOD | 1.45   | < MLOD | 22.65  | 6.39   | 6.90   | 0.99   |        |
|         | 7 | 4.65   | 8.44   | 5.10   | < MLOQ | 8.05   | 2.62 | 1.80   | < MLOD | 1.10   | < MLOD | < MLOD | < MLOD | 0.70   | < MLOD | 11.80  | 7.44   | 6.10   | 0.95   |        |
|         | 8 | 3.70   | 5.64   | 13.70  | < MLOQ | 5.30   | 3.85 | 1.85   | < MLOQ | 0.55   | < MLOQ | < MLOD | < MLOD | 0.50   | < MLOD | 6.35   | 6.48   | 7.05   | 1.05   |        |

MLOD - method limit of detection; MLOQ - method limit of quantification.

**Table S2.** Extended survey of the occurrence data for the targeted PFASs in European surface water samples (ng L<sup>-1</sup>); nd, not detected.

| Country  | River                   | PFBA  | PFPeA | PFHxA | PFHpA | PFOA  | PFNA  | PFDA | PFUnD<br>A | PFDoD<br>A | PFTTrDA | PFTeDA | PFBS | PFHxS | PFOS  | REF.       |
|----------|-------------------------|-------|-------|-------|-------|-------|-------|------|------------|------------|---------|--------|------|-------|-------|------------|
| Portugal | Ave (present study)     | 0.20  | nd    | nd    | 3.32  | 4.94  | 0.36  | 0.41 | nd         | nd         | nd      | nd     | 0.24 | nd    | 0.19  | This study |
| Portugal | Leça (present study)    | 0.02  | nd    | nd    | 0.11  | 3.58  | 0.26  | 0.30 | nd         | nd         | nd      | 0.3    | 0.36 | 0.07  | 3.22  | This study |
| Portugal | Antuã (present study)   | 1.91  | nd    | nd    | 0.11  | 7.78  | 0.19  | 0.04 | nd         | nd         | nd      | 0.3    | 0.23 | nd    | 1.25  | This study |
| Portugal | Cértima (present study) | 4.51  | nd    | nd    | 1.28  | 3.08  | 0.56  | 0.50 | nd         | nd         | nd      | nd     | 0.23 | nd    | nd    | This study |
| Austria  | Danube                  | -     | -     | 2.06  | 2     | 18    | 0     | 0    | 0          | 0          | -       | -      | -    | 4.33  | -     | [1]        |
| Austria  | Schwechat               | -     | -     | 5.00  | 1.67  | 3.77  | 0.8   | 0.77 | 0          | 0          | -       | -      | -    | 20.37 | -     | [1]        |
| Austria  | Liesing                 | -     | -     | 1.97  | 2.63  | 10.33 | 1.3   | 1.2  | 0          | 0          | -       | -      | -    | 15.33 | -     | [1]        |
| France   | Rhône                   | -     | -     | 81.46 | -     | 2.53  | -     | -    | -          | -          | -       | -      | -    | 1.27  | 3.23  | [2]        |
| Germany  | White Elster            | 0.5   | 0.25  | 1     | -     | 13.9  | 1.25  | 5    | 0.5        | -          | -       | -      | 1.25 | 0.5   | 1     | [3]        |
| Germany  | Saale                   | 0.5   | 1.1   | 3.8   | 1.1   | 21.2  | 3.8   | 2.2  | 3.3        | -          | -       | -      | -    | -     | 2.2   | [3]        |
| Germany  | Elbe                    | 2.7   | 1.1   | 1.6   | 0.3   | 2.4   | 0.8   | -    | -          | -          | -       | -      | -    | 0.54  | -     | [3]        |
| Germany  | Rhine                   | 4.31  | 2.58  | 2.94  | 1.22  | 2.63  | 0.42  | 0.37 | 0.06       | 0.03       | 0.04    | 0.01   | 21.9 | 1.98  | 13.8  | [4]        |
| Ireland  | Nore                    | -     | 301   | 134   | 6.9   | 173   | 43    | 22   | -          | -          | -       | -      | 49.5 | -     | -     | [5]        |
| Ireland  | Suir                    | -     | 424   | 173   | 5.5   | 205   | 46    | 24   | -          | -          | -       | -      | 68.9 | -     | -     | [5]        |
| Ireland  | Liffey                  | -     | 250   | 123   | 6.9   | 138   | 31    | 16   | -          | -          | -       | -      | 64   | -     | -     | [5]        |
| Ireland  | Annalee                 | -     | 269   | 133   | 8.8   | 197   | 56    | 24   | -          | -          | -       | -      | 35   | -     | -     | [5]        |
| Italy    | Olona                   | 8.1   | 6.6   | 11.46 | 15.02 | 79.5  | 26.95 | 24.1 | 11.9       | 1.9        | -       | -      | 17.4 | 3.6   | 16.9  | [6]        |
| Italy    | Seveso                  | 2.5   | 3.75  | 4.25  | 6.75  | 34.5  | 8.75  | 7    | 2.75       | 2          | -       | -      | 10   | 3.75  | 9.75  | [6]        |
| Italy    | Lambro                  | 4.88  | 2.59  | 2.08  | 3.68  | 20.82 | 7.25  | 7.68 | 2.38       | 1.5        | -       | -      | 5.47 | 4.29  | 14.32 | [6]        |
| Spain    | Guadalquivir            | 214.3 | 8.6   | -     | 4.3   | 11.6  | 5.1   | 1.0  | -          | -          | -       | nd     | 10.1 | 4.1   | 1.8   | [7]        |

|        |                   |       |      |      |      |       |       |       |       |       |       |      |       |       |       |      |
|--------|-------------------|-------|------|------|------|-------|-------|-------|-------|-------|-------|------|-------|-------|-------|------|
| Spain  | Jucar             | 49.87 | 0.38 | 3.82 | 2.22 | 4.36  | 2.31  | 14.21 | 0.04  | nd    | 0     | 0.01 | nd    | 3.25  | 11.29 | [8]  |
| Spain  | Ebro              | 35.2  | 1.1  | 1.7  | 2.0  | 7.3   | 0.4   | 0.7   | -     | 0.3   | -     | 0.3  | nd    | 0.5   | 2.2   | [7]  |
| Spain  | Llobregat         | 19.5  | 0.40 | 2.43 | 6.16 | 20.3  | 3.87  | 0.41  | 0.01  | nd    | 0.7   | nd   | 0.32  | 6.7   | 234   | [9]  |
| Sweden | Torne älv         | 0.94  | -    | 0.25 | 1.35 | 0.26  | 0.15  | 0.13  | 0.077 | 0.053 | 0.015 | -    | 0.39  | 0.069 | 0.082 | [10] |
| Sweden | Kalix älv         | 0.76  | -    | 0.25 | 1.35 | 0.23  | 0.23  | 0.015 | 0.10  | 0.10  | 0.14  | -    | 0.015 | 0.015 | 0.053 | [10] |
| Sweden | Råne älv          | 1.2   | -    | 0.25 | 1.35 | 0.21  | 1.3   | 0.28  | 0.16  | 0.19  | 0.15  | -    | 0.015 | 0.15  | 0.34  | [10] |
| Sweden | Lule älv          | 0.60  | -    | 0.25 | 1.35 | 0.39  | 0.23  | 0.14  | 0.073 | 0.033 | 0.015 | -    | 0.015 | 0.051 | 0.058 | [10] |
| Sweden | Alterälven        | 0.60  | -    | 0.25 | 0.61 | 0.043 | 0.18  | 0.11  | 0.044 | 0.015 | 0.015 | -    | 0.015 | 0.015 | 0.12  | [10] |
| Sweden | Pite älv          | 0.97  | -    | 0.25 | 0.54 | 0.44  | 0.40  | 0.22  | 0.081 | 0.069 | 0.015 | -    | 4.1   | 0.31  | 0.28  | [10] |
| Sweden | Skellefte älv     | 0.91  | -    | 0.25 | 1.35 | 0.39  | 0.36  | 0.27  | 0.17  | 0.12  | 0.015 | -    | 5.1   | 0.19  | 0.30  | [10] |
| Sweden | Rickleån          | 0.99  | -    | 0.25 | 1.35 | 0     | 0.09  | 0.015 | 0.04  | 0.015 | 0.015 | -    | 0.03  | 0.015 | 0.04  | [10] |
| Sweden | Ume älv           | 0.63  | -    | 0.25 | 1.35 | 0.26  | 0.32  | 0.064 | 0.058 | 0.015 | 0.015 | -    | 0.048 | 0.14  | 0.25  | [10] |
| Sweden | Ume älv [Gubböle] | 0.57  | -    | 0.25 | 1.0  | 3.3   | 5.8   | 4.4   | 1.6   | 0.77  | 0.46  | -    | 16    | 18    | 6.9   | [10] |
| Sweden | Vindelälven       | 0.47  | -    | 0.25 | 1.35 | 0.043 | 0.26  | 0.015 | 0.074 | 0.067 | 0.094 | -    | 0.015 | 0.015 | 0.074 | [10] |
| Sweden | Vindelälven       | 0.99  | -    | 0.25 | 1.35 | 0.043 | 0.091 | 0.015 | 0.041 | 0.015 | 0.015 | -    | 0.030 | 0.015 | 0.042 | [10] |
| Sweden | Öre älv           | 0.62  | -    | 0.25 | 1.35 | 0.39  | 0.36  | 0.14  | 0.084 | 0.043 | 0.015 | -    | 0.17  | 0.12  | 0.18  | [10] |
| Sweden | Lögde älv         | 0.96  | -    | 0.25 | 1.35 | 0.043 | 0.16  | 0.015 | 0.015 | 0.015 | 0.015 | -    | 0.015 | 0.015 | 0.060 | [10] |
| Sweden | Gide älv          | 0.79  | -    | 0.25 | 1.35 | 0.043 | 0.12  | 0.015 | 0.015 | 0.015 | 0.015 | -    | 0.015 | 0.015 | 0.015 | [10] |
| Sweden | Ångermanälven     | 0.96  | -    | 0.25 | 1.35 | 0.043 | 0.40  | 0.12  | 0.10  | 0.015 | 0.015 | -    | 0.015 | 0.015 | 0.16  | [10] |
| Sweden | Indalsälven       | 1.0   | -    | 0.25 | 0.36 | 1.5   | 2.8   | 1.9   | 0.84  | 0.40  | 0.84  | -    | 6.9   | 7.6   | 3.1   | [10] |
| Sweden | Ljungan           | 1.2   | -    | 0.25 | 1.35 | 0.043 | 0.21  | 0.024 | 0.044 | 0.015 | 0.015 | -    | 0.015 | 0.015 | 0.12  | [10] |
| Sweden | Delångersån       | 1.9   | -    | 0.25 | 1.4  | 3.6   | 5.6   | 4.3   | 1.8   | 0.82  | 0.41  | -    | 17    | 16    | 6.8   | [10] |
| Sweden | Ljusnan           | 1.1   | -    | 0.25 | 1.35 | 0.34  | 0.33  | 0.092 | 0.087 | 0.035 | <0.02 | -    | 0.44  | 0.10  | 0.046 | [10] |
| Sweden | Gavleån           | 2.1   | -    | 1.1  | 0.82 | 0.92  | 0.41  | 0.17  | 0.078 | 0.015 | 0.015 | -    | 4.9   | 0.38  | 0.29  | [10] |
| Sweden | Dalälven          | 1.2   | -    | 1.1  | 0.56 | 0.40  | 0.37  | 0.15  | 0.16  | 0.046 | 0.42  | -    | 0.42  | 0.13  | 0.61  | [10] |
| Sweden | Fyrisån           | 2.5   | -    | 4.2  | 1.4  | 4.2   | 0.63  | 0.34  | 0.092 | 0.034 | 0.015 | -    | 2.2   | 12    | 5.3   | [10] |

|                 |              |      |      |      |      |      |      |       |       |       |       |   |       |       |      |      |
|-----------------|--------------|------|------|------|------|------|------|-------|-------|-------|-------|---|-------|-------|------|------|
| Sweden          | Norrström    | 2.9  | -    | 1.9  | 1.3  | 1.6  | 0.51 | 0.22  | 0.075 | 0.061 | 0.015 | - | 0.83  | 1.2   | 2.4  | [10] |
| Sweden          | Nyköpingsån  | 3.7  | -    | 1.5  | 1.4  | 1.1  | 0.44 | 0.18  | 0.093 | 0.015 | 0.093 | - | 0.61  | 0.64  | 0.71 | [10] |
| Sweden          | Motala ström | 2.1  | -    | 0.25 | 1.35 | 0.61 | 0.32 | 0     | 0.047 | 0.015 | 0.015 | - | 0.015 | 0.29  | 0.63 | [10] |
| Sweden          | Botorpsström | 2.0  | -    | 0.25 | 1.35 | 0.22 | 0.19 | 0.015 | 0.057 | 0.015 | 0.015 | - | 0.015 | 0.015 | 0.11 | [10] |
| Sweden          | Emån         | 2.3  | -    | 0.51 | 1.7  | 3.8  | 5.4  | 3.7   | 1.5   | 0.70  | 1.5   | - | 12    | 14    | 5.1  | [10] |
| Sweden          | Alsterån     | 1.6  | -    | 0.25 | 1.35 | 0.42 | 0.38 | 0.038 | 0.097 | 0.015 | 0.015 | - | 0.015 | 0.015 | 0.25 | [10] |
| Sweden          | Ljungbyån    | 1.5  | -    | 1.3  | 0.74 | 0.91 | 0.19 | 0.065 | 0.051 | 0.015 | 0.015 | - | 0.042 | 0.46  | 0.28 | [10] |
| Sweden          | Lyckebyån    | 1.9  | -    | 0.25 | 0.89 | 0.64 | 0.45 | 0.17  | 0.12  | 0.031 | 0.015 | - | 0.015 | 0.47  | 1.1  | [10] |
| Sweden          | Mörumsån     | 1.8  | -    | 0.25 | 0.85 | 0.98 | 0.60 | 0.22  | 0.14  | 0.080 | 0.015 | - | 0.51  | 0.42  | 0.60 | [10] |
| Sweden          | Helge Å      | 1.8  | -    | 1.5  | 1.0  | 1.2  | 0.61 | 0.30  | 0.18  | 0.095 | 0.015 | - | 19    | 1.9   | 0.54 | [10] |
| Sweden          | Kävlingeån   | 1.8  | -    | 2.6  | 0.96 | 1.1  | 0.12 | 0.088 | 0.037 | 0.015 | 0.015 | - | 0.15  | 0.73  | 0.50 | [10] |
| Sweden          | Rönneån      | 2.3  | -    | 1.6  | 0.93 | 1.3  | 0.26 | 0.015 | 0.015 | 0.015 | 0.015 | - | 0.87  | 3.0   | 3.9  | [10] |
| Sweden          | Lagan        | 1.8  | -    | 0.25 | 1.35 | 1.0  | 0.36 | 0.058 | 0.018 | 0.016 | 0.015 | - | 0.083 | 0.34  | 0.56 | [10] |
| Sweden          | Nissan       | 2.7  | -    | 1.1  | 0.85 | 1.2  | 0.52 | 0.11  | 0.050 | 0.030 | 0.015 | - | 0.44  | 0.41  | 0.81 | [10] |
| Sweden          | Ätran        | 1.5  | -    | 0.25 | 1.35 | 0.69 | 0.33 | 0.045 | 0.015 | 0.015 | 0.015 | - | 0.015 | 0.20  | 0.35 | [10] |
| Sweden          | Viskan       | 1.4  | -    | 1.3  | 0.95 | 1.6  | 0.54 | 0.19  | 0.081 | 0.015 | 0.015 | - | 0.015 | 0.39  | 0.79 | [10] |
| Sweden          | Göta älv     | 1.3  | -    | 0.25 | 0.55 | 1.1  | 0.41 | 0.11  | 0.039 | 0.015 | 0.015 | - | 0.041 | 0.34  | 0.79 | [10] |
| The Netherlands | Waal         | 7,5  | 5.3  | 5.5  | 1.86 | 4.2  | 0.7  | 0.44  | -     | -     | -     | - | 20.2  | 2     | 3.7  | [11] |
| UK              | Thames       | 6.96 | 15.7 | 12.2 | 4.1  | 8.51 | 1.18 | 0.86  | 0.07  | 0.04  | -     | - | 5.06  | 7.14  | 13.8 | [4]  |

**Table S3.** Target compounds, acronym, CAS number, structure, and relative molecular mass ( $M_r$ ).

| Compound                 | Acronym | CAS number | Structure                                                                             |
|--------------------------|---------|------------|---------------------------------------------------------------------------------------|
| Perfluorobutanoic acid   | PFBA    | 375-22-4   |    |
| Perfluoropentanoic acid  | PFPeA   | 2706-90-3  |    |
| Perfluorohexanoic acid   | PFHxA   | 307-24-4   |    |
| Perfluoroheptanoic acid  | PFHpA   | 375-85-9   |    |
| Perfluorooctanoic acid   | PFOA    | 335-67-1   |   |
| Perfluorononanoic acid   | PFNA    | 375-95-1   |  |
| Perfluorodecanoic acid   | PFDA    | 335-76-2   |  |
| Perfluoroundecanoic acid | PFUnA   | 2058-94-8  |  |
| Perfluorododecanoic acid | PFDoDA  | 307-55-1   |  |

|                              |         |            |                                                                                       |
|------------------------------|---------|------------|---------------------------------------------------------------------------------------|
| Perfluorotridecanoic acid    | PFTTrDA | 72629-94-8 | 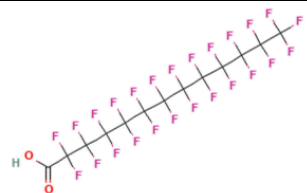   |
| Perfluorotetradecanoic acid  | PFTeDA  | 376-06-7   |    |
| Perfluorohexadecanoic acid   | PFHxDA  | 67905-19-5 |    |
| Perfluorooctadecanoic acid   | PFODA   | 16517-11-6 |    |
| Perfluorobutanesulfonic acid | PFBS    | 375-73-5   |  |
| Perfluorohexasulfonic acid   | PFHxS   | 355-46-4   |  |
| Perfluorooctanesulfonic acid | PFOS    | 1763-23-1  |  |
| Perfluorodecanesulfonic acid | PFDS    | 335-77-3   |  |

Perfluorooctanesulfonamide

PFOSA

754-91-6

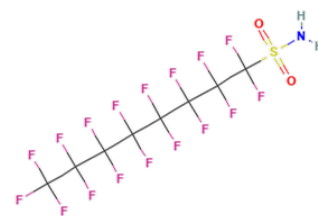

**Table S4.** Summary of accurate masses from selected PFASs and their product ions detected in the MS/HRMS spectra.

| Analyte | m/z           |                            |                            |
|---------|---------------|----------------------------|----------------------------|
|         | Precursor ion | 1 <sup>st</sup> transition | 2 <sup>nd</sup> transition |
| PFBA    | 213           | 169                        | 119                        |
| PFPeA   | 263           | 219                        | 69                         |
| PFHxA   | 313           | 269                        | 169                        |
| PFHpA   | 363           | 319                        | 169                        |
| PFOA    | 413           | 369                        | 169                        |
| PFNA    | 463           | 219                        | 169                        |
| PFDA    | 513           | 469                        | 169                        |
| PFUdA   | 563           | 519                        | 169                        |
| PFDoA   | 613           | 569                        | 169                        |
| PFTeDA  | 713           | 669                        | 169                        |
| PFHxDA  | 813           | 769                        | 169                        |
| PFODA   | 913           | 869                        | 169                        |
| PFBS    | 299           | 80                         | 99                         |
| PFHxS   | 399           | 80                         | 99                         |
| PFOS    | 499           | 80                         | 99                         |
| PFDS    | 599           | 80                         | 99                         |
| PFOSA   | 498           | 78                         | 498                        |
| PFHxPA  | 399           | 79                         | 399                        |
| PFOPA   | 499           | 79                         | 499                        |
| PFDPA   | 599           | 79                         | 599                        |

1<sup>st</sup> transition: quantification ion

2<sup>nd</sup> transition: confirmation ion

**Table S5.** Retention time, linearity and method limit of quantification (MLOQ) for each target analyte.

| Analyte | Retention time (min) | Instrumental linearity range ( $\mu\text{g L}^{-1}$ ) | MLOQ ( $\text{ng L}^{-1}$ ) |
|---------|----------------------|-------------------------------------------------------|-----------------------------|
| PFBA    | 0.67                 | 5 - 100                                               | 0.040                       |
| PFPeA   | 1.04                 | 5 - 100                                               | 0.040                       |
| PFHxA   | 2.24                 | 5 - 100                                               | 0.400                       |
| PFHpA   | 4.24                 | 5 - 100                                               | 0.400                       |
| PFOA    | 5.52                 | 0.5 - 100                                             | 0.040                       |
| PFNA    | 6.34                 | 0.5 - 100                                             | 0.040                       |
| PFDA    | 6.97                 | 0.5 - 100                                             | 0.040                       |
| PFUnDA  | 7.50                 | 1 - 100                                               | 0.040                       |
| PFDoDA  | 7.95                 | 0.5 - 100                                             | 0.040                       |
| PFTTrDA | 8.34                 | 5 - 100                                               | 0.100                       |
| PFTeDA  | 8.71                 | 5 - 100                                               | 0.100                       |
| PFHxDA  | 9.20                 | 5 - 100                                               | 0.100                       |
| PFODA   | 10.15                | 20 - 100                                              | 0.800                       |
| PFBS    | 1.48                 | 0.5 - 100                                             | 0.020                       |
| PFHxS   | 3.17                 | 0.1 - 100                                             | 0.004                       |
| PFOS    | 6.45                 | 0.1 - 100                                             | 0.004                       |
| PFDS    | 7.50                 | 0.1 - 100                                             | 0.004                       |
| PFOSA   | 6.10                 | 10 - 100                                              | 0.200                       |

**Table S6.** Measured environmental concentration (MEC;  $\text{mg L}^{-1}$ ), *i.e.*, the highest concentration of PFASs, found in the target Portuguese rivers and respective sampling point (SP) and season.

| Compound | MEC ( $\text{mg L}^{-1}$ ) | River, SP and season |
|----------|----------------------------|----------------------|
| PFBA     | 2.26E-05                   | Antuã, SP1, Wet      |
| PFHxS    | 1.45E-06                   | Cértima, SP6, Dry    |
| PFBS     | 7.05E-06                   | Cértima, SP8, Dry    |
| PFHpA    | 1.84E-05                   | Ave, SP9, Dry        |
| PFOA     | 1.70E-05                   | Antuã, SP3, Dry      |
| PFNA     | 2.55E-06                   | Ave, SP8, Dry        |
| PFDA     | 3.40E-06                   | Ave, SP8, Dry        |
| PFTeA    | 5.45E-06                   | Antuã, SP3, Dry      |
| PFOS     | 2.27E-05                   | Cértima, SP6, Dry    |

---

## References

- [1] M. Clara, O. Gans, S. Weiss, D. Sanz-Escribano, S. Scharf, C. Scheffknecht, Perfluorinated alkylated substances in the aquatic environment: An Austrian case study, *Water Research*, 43 (2009) 4760-4768.
- [2] N. Schmidt, V. Fauvelle, J. Castro-Jiménez, K. Lajaunie-Salla, C. Pinazo, C. Yohia, R. Sempéré, Occurrence of perfluoroalkyl substances in the Bay of Marseille (NW Mediterranean Sea) and the Rhône River, *Marine Pollution Bulletin*, 149 (2019) 110491.
- [3] U. Shafique, S. Schulze, C. Slawik, A. Böhme, A. Paschke, G. Schüürmann, Perfluoroalkyl acids in aqueous samples from Germany and Kenya, *Environ Sci Pollut Res Int*, 24 (2017) 11031-11043.
- [4] Y. Pan, H. Zhang, Q. Cui, N. Sheng, L.W.Y. Yeung, Y. Sun, Y. Guo, J. Dai, Worldwide Distribution of Novel Perfluoroether Carboxylic and Sulfonic Acids in Surface Water, *Environmental Science & Technology*, 52 (2018) 7621-7629.
- [5] B. Huerta, B. McHugh, F. Regan, Development and application of an LC-MS method to the determination of poly- and perfluoroalkyl substances (PFASs) in drinking, sea and surface water samples, *Analytical Methods*, 14 (2022) 2090-2099.
- [6] S. Castiglioni, S. Valsecchi, S. Polesello, M. Rusconi, M. Melis, M. Palmiotto, A. Manenti, E. Davoli, E. Zuccato, Sources and fate of perfluorinated compounds in the aqueous environment and in drinking water of a highly urbanized and industrialized area in Italy, *Journal of Hazardous Materials*, 282 (2015) 51-60.
- [7] M. Lorenzo, J. Campo, M. Farré, F. Pérez, Y. Picó, D. Barceló, Perfluoroalkyl substances in the Ebro and Guadalquivir river basins (Spain), *Science of the Total Environment*, 540 (2016) 191-199.
- [8] J. Campo, M. Lorenzo, F. Pérez, Y. Picó, M.I. Farré, D. Barceló, Analysis of the presence of perfluoroalkyl substances in water, sediment and biota of the Júcar River (E Spain). Sources, partitioning and relationships with water physical characteristics, *Environmental Research*, 147 (2016) 503-512.
- [9] J. Campo, F. Pérez, A. Masiá, Y. Picó, M.I. Farré, D. Barceló, Perfluoroalkyl substance contamination of the Llobregat River ecosystem (Mediterranean area, NE Spain), *Science of The Total Environment*, 503-504 (2015) 48-57.
- [10] M.A. Nguyen, K. Wiberg, E. Ribeli, S. Josefsson, M. Futter, J. Gustavsson, L. Ahrens, Spatial distribution and source tracing of per- and polyfluoroalkyl substances (PFASs) in surface water in Northern Europe, *Environmental Pollution*, 220 (2017) 1438-1446.
- [11] W.A. Gebbink, L. van Asseldonk, S.P.J. van Leeuwen, Presence of Emerging Per- and Polyfluoroalkyl Substances (PFASs) in River and Drinking Water near a Fluorochemical Production Plant in the Netherlands, *Environmental Science & Technology*, 51 (2017) 11057-11065.
